# Supplementary material for: Training of Leadership Skills in Medical Education
Source: PubMed Central journal article supplement — GMS Z Med Ausbild. 2013 Nov 15;30(4):Doc49. (PMC3839077), 2013-11-15
Supplement: ZMA-30-49-s-001.pdf [file ZMA-30-49-s-001.pdf]

| Authors (Year)                                               | Concept of leadership                                                                                                                                                                         | Target group and group size Duration                                                                                                                                                                                                                           | Content of training of leadership skills                                                                                                                                                                                                                                                             | Evaluation design                                                                                                                                                                                                              | Reported trainings effects                                                                                                                                                                                                                                                                     |
|--------------------------------------------------------------|-----------------------------------------------------------------------------------------------------------------------------------------------------------------------------------------------|----------------------------------------------------------------------------------------------------------------------------------------------------------------------------------------------------------------------------------------------------------------|------------------------------------------------------------------------------------------------------------------------------------------------------------------------------------------------------------------------------------------------------------------------------------------------------|--------------------------------------------------------------------------------------------------------------------------------------------------------------------------------------------------------------------------------|------------------------------------------------------------------------------------------------------------------------------------------------------------------------------------------------------------------------------------------------------------------------------------------------|
| Devaul RA, Knight JA, Edwards KA (1994)                      | Leadership as constant process to convey clearance, to take responsibility and act courageously                                                                                               | <ul style="list-style-type: none"> <li>– Training of leadership skills</li> <li>– Target group: medical students</li> <li>– Duration: four-year program with 1 hour/week</li> </ul>                                                                            | <ul style="list-style-type: none"> <li>– 1st year: group discussions with guest speakers</li> <li>– 2nd year: mentoring program</li> <li>– 3rd year: workshops and exercises for task analysis and self reflection</li> <li>– 4th year: supervision and exchange with experienced leaders</li> </ul> | Non reported                                                                                                                                                                                                                   | Long term effects assumed, no effects reported                                                                                                                                                                                                                                                 |
| Wipf JE, Pinsky LE, Burke W (1995)                           | None reported<br>( <i>Content of training: Goal-and role clarification, effective Leadership of workshops, give feedback, control results, define gratification criteria, communication</i> ) | <ul style="list-style-type: none"> <li>– Training of teaching and leadership skills</li> <li>– Target group: Residents</li> <li>– Duration: 6 hours with 3x2-hourly Sessions; 1 Session for leadership skills</li> </ul>                                       | 1 Session for 2 hours: <ul style="list-style-type: none"> <li>– Group discussion on leadership skill case</li> <li>– Group discussion of a ward-round case</li> <li>– Role play</li> </ul>                                                                                                           | Posttest: Satisfactory questionnaire                                                                                                                                                                                           | High satisfaction ( $M = 4.2 - 4.5$ ; $1 = poor$ ; $5 = excellent$ )                                                                                                                                                                                                                           |
| Lee MT, Tse AM, Naguwa GS (2004)                             | None reported                                                                                                                                                                                 | <ul style="list-style-type: none"> <li>– Workshop for Team and leadership skills</li> <li>– Target group: Residents (<math>N=10</math>)</li> <li>– Duration: 3 hours</li> </ul>                                                                                | <ul style="list-style-type: none"> <li>– Contents: Team management, leadership of discussions, Leadership of younger Residents</li> <li>– Implementation with role plays, group discussions, self-reflections</li> </ul>                                                                             | Pre- and posttest: Questionnaire to assess self-efficacy                                                                                                                                                                       | <ul style="list-style-type: none"> <li>– Significant increase of self efficacy in team management, leadership of discussions and leadership of younger residents</li> <li>– Increase in leadership and communication skills</li> <li>– Rating of the workshop as being very helpful</li> </ul> |
| Stoller JK, Rose M, Lee R, Dolgan C, Hoogwerf BJ (2004)      | None reported<br>( <i>Focus on good work together in the team and with colleagues</i> )                                                                                                       | <ul style="list-style-type: none"> <li>– Training on teamwork und leadership skills</li> <li>– Target group: Residents (<math>N=32</math>)</li> <li>– Duration: 1 day</li> </ul>                                                                               | <ul style="list-style-type: none"> <li>– Simulation on team development</li> <li>– Discussion on leadership principles and the theory of Kouzes &amp; Posner on transformational leadership</li> <li>– Simulation through game of Pictionary</li> </ul>                                              | Pre- und posttest: Questionnaire <ol style="list-style-type: none"> <li>1) On efficacy of training</li> <li>2) On leadership skills in general</li> </ol>                                                                      | <ul style="list-style-type: none"> <li>– High efficacy of training (significant increase in estimated utility)</li> <li>– Significant increase in awareness of leadership principles</li> </ul>                                                                                                |
| Awad SS, Hayley B, Fagan SP, Berger DH, Brunicardi FC (2004) | Leadership skills as successful influence in the framework of good teamwork through communication,                                                                                            | <ul style="list-style-type: none"> <li>– Training of leadership skills within the regular curriculum</li> <li>– Target group: Residents (no numbers reported)</li> <li>– Duration: within (80-hourly) weekly working time (no more specific data on</li> </ul> | <ul style="list-style-type: none"> <li>– effective time management</li> <li>– high-quality patient care</li> <li>– collaborative leadership understanding (focus: coordination, communication, integrity)</li> </ul>                                                                                 | Pre- and Posttest: „Internal Strength Scorecard Survey“: Questionnaire to assess leadership skills (Coordination, kommunikation, integrität) <ul style="list-style-type: none"> <li>– Pretest 6 months before begin</li> </ul> | Increase in leadership skills: <ul style="list-style-type: none"> <li>– Coordination (13% increase)</li> <li>– Communication (12% increase)</li> <li>– Integrity (12% increase)</li> </ul>                                                                                                     |

| Authors (Year)                                                    | Concept of leadership                                                                                                                                                                                                                         | Target group and group size Duration                                                                                                                                                                        | Content of training of leadership skills                                                                                                                                                                                                            | Evaluation design                                                                                                                                                                                                                                 | Reported trainings effects                                                                                                                                                                                                                                                                                                         |
|-------------------------------------------------------------------|-----------------------------------------------------------------------------------------------------------------------------------------------------------------------------------------------------------------------------------------------|-------------------------------------------------------------------------------------------------------------------------------------------------------------------------------------------------------------|-----------------------------------------------------------------------------------------------------------------------------------------------------------------------------------------------------------------------------------------------------|---------------------------------------------------------------------------------------------------------------------------------------------------------------------------------------------------------------------------------------------------|------------------------------------------------------------------------------------------------------------------------------------------------------------------------------------------------------------------------------------------------------------------------------------------------------------------------------------|
|                                                                   | participation and integrity                                                                                                                                                                                                                   | trainings duration)                                                                                                                                                                                         |                                                                                                                                                                                                                                                     | of training<br>– Posttest directly after training                                                                                                                                                                                                 |                                                                                                                                                                                                                                                                                                                                    |
| Smith KL, Petersen DJ, Soriano R, Friedman E, Bensinger LD (2007) | None reported<br>( <i>assessed items: define goals, know stakeholders and know organizational strengths and weaknesses</i> )                                                                                                                  | – Training of teaching and leadership skills<br>– Target group: medical students (N=23)<br>– Duration: 1 week (6-8 hours daily)<br>–                                                                        | –two leadership workshops with discussion of effective leadership principles<br><br>–four sessions on project development and implementation (focus: strategic planning, negotiation, coalition building)<br><br>–Presentation of teaching projects | Posttest<br>– Questionnaire of teaching effectiveness<br>– Questionnaire on leadership effectiveness<br>– Each baseline and increase estimation<br>– Long-term assessment of teaching project development (11 months after end of training, N=13) | – Increase of mean teaching effectiveness (M=4.50; 1 = <i>strongly disagree</i> , 5 = <i>strongly agree</i> )<br>– Increase of mean leadership effectiveness, i.e. goal-setting (M=4.52; 1 = <i>strongly disagree</i> , 5 = <i>strongly agree</i> )<br>– Success of teaching projects<br>– Wish for sustainability of the training |
| Levine SA, Chao SH, Brett B, et al. (2008)                        | None reported<br>( <i>assessed items: Feedback behavior, team leadership, conflict-solving within an interdisciplinary team, management of diverse responsibilities</i> )                                                                     | – Training of professional, teaching and leadership skills<br>– Duration: 2-day project work in three cohorts<br>– Target group: chief residents (N=46)<br>– Trainers of leadership skills: faculty members | 20 minute interactive workshop on leadership skills within geriatric case example (focus: implementation of professional competence)                                                                                                                | Pretest:<br>Questionnaire on confidence in own leadership skills<br><br>Posttest:<br>Questionnaire on gain in knowledge on leadership skills                                                                                                      | – Mean confidence (M = 3.63; SD = .55; 1 = <i>not at all</i> , 5 = <i>very much</i> )<br>– Gain in knowledge on leadership skills (M = 4.30; SD = .61; 1 = <i>not at all</i> , 5 = <i>very much</i> )                                                                                                                              |
| Ciampa E, Hunt AA, Arneson KO, Mordes DA, et al. (2011)           | Effective leadership behavior includes self leadership, an understanding of the group consideration of the specific task contexts<br><br>Leadership skills comprehend: motivation of others, give feedback, coaching and understand conflicts | – Interactive workshop on development of leadership skills<br>– Target group: MD/PhD students (N = 59, 3 cohorts)<br>– Duration: 2 Days                                                                     | –Direct instruction<br>–Experiential learning<br>–9 Case Studies                                                                                                                                                                                    | Posttest:<br>Questionnaire on Quality of workshops relating to organization and content<br>(i.e. „This component was well organized and executed“; „This component included relevant concepts and skills“)                                        | Quality of workshops M = 3.3 - 4.7 (1 = <i>strongly disagree</i> ; 5 = <i>strongly agree</i> )                                                                                                                                                                                                                                     |

Tab 3.: Comparison of the content of the publications included
